# Supplementary material for: Simultaneous targeting of CD44 and EpCAM with a bispecific aptamer effectively inhibits intraperitoneal ovarian cancer growth
Source: PubMed Central journal article supplement — Theranostics. 2017 Mar 23;7(5):1373–88. doi: 10.7150/thno.17826 (PMC5399600; doi:10.7150/thno.17826), 2017-03-23
Supplement: thnov07p1373s1.pdf [file thnov07p1373s1.pdf]

## SUPPLEMENTARY INFORMATION

### **Simultaneous targeting of CD44 and EpCAM with a bispecific aptamer effectively inhibits intraperitoneal ovarian cancer growth**

Jingying Zheng<sup>1,3\*</sup>, Shuhua Zhao<sup>3\*</sup>, Xiaolin Yu<sup>1</sup>, Shuang Huang<sup>2</sup> & Hong Yan Liu<sup>1</sup>

<sup>1</sup>Center for Biotechnology and Genomic Medicine, Medical College of Georgia, Augusta University, Augusta, GA, 30912, USA

<sup>2</sup>Department of Anatomy and Cell Biology, University of Florida College of Medicine, Gainesville, FL, 32610, USA

<sup>3</sup>Department of Gynecology and Obstetrics, The second hospital of Jilin University, Jinlin University, Changchun, 130041, China

Running Title: Suppressing ovarian cancer growth by bispecific CD44-EpCAM aptamer

\* These authors contributed equally to this work.

Correspondence should be addressed to H.Y.L (Phone: 706-721-7149; Fax: 706-721-3688; email: HOLIU@augusta.edu)

**A CD44-EpCAM**

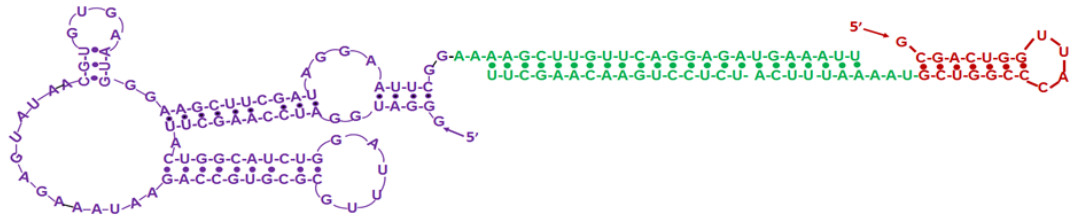

**B CD44-EpCAM No linker-1**

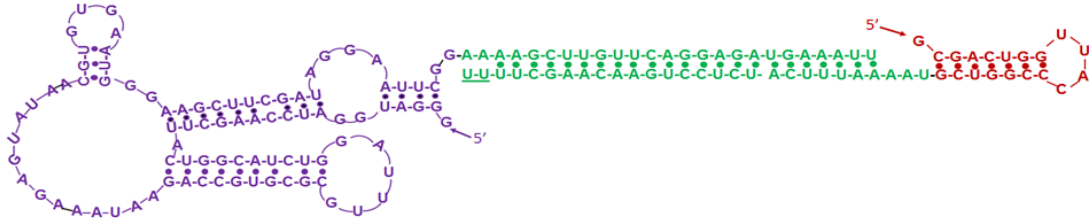

**C CD44-EpCAM No linker-2**

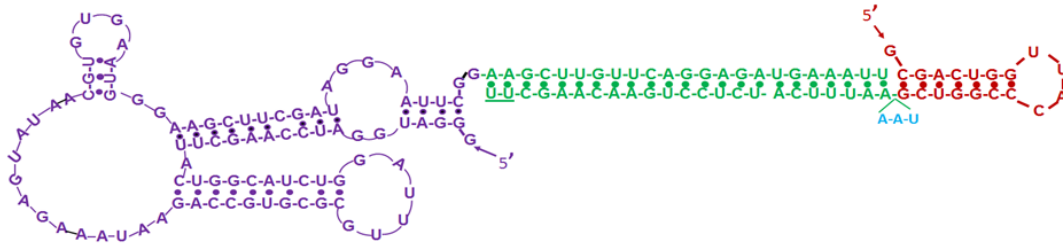

**D**

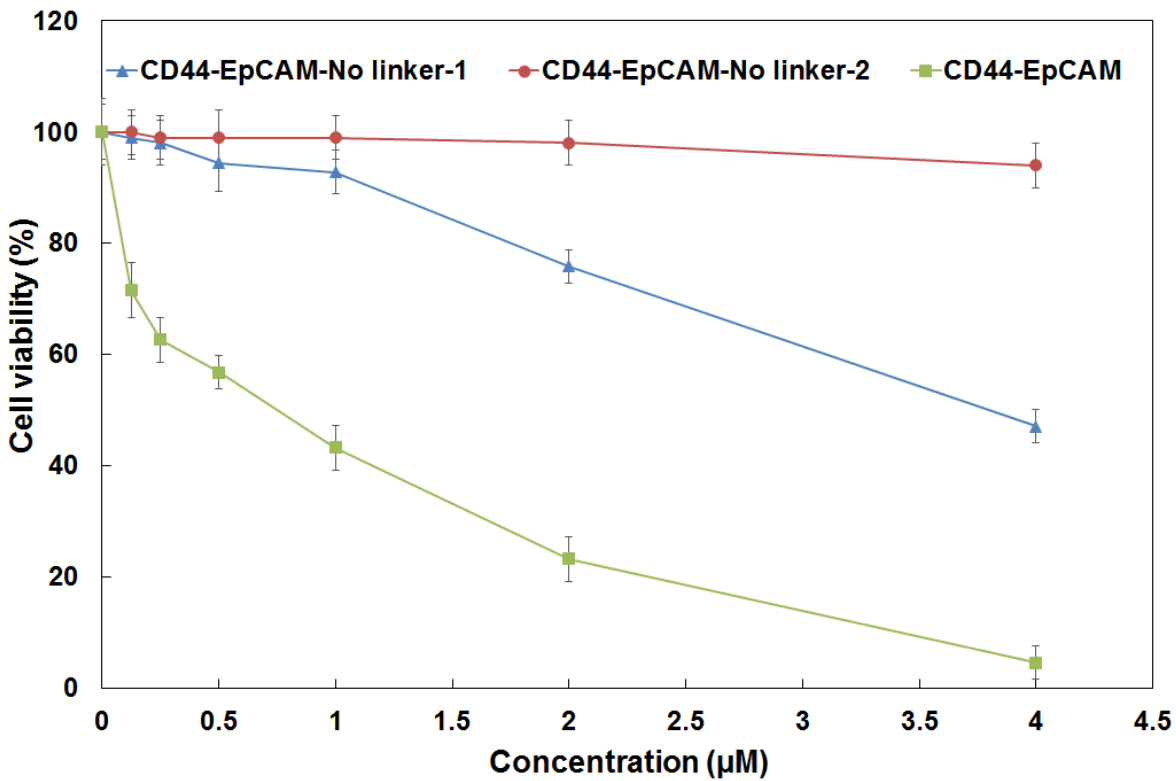

**Figure S1. Effect of unpaired base linkers between aptamer and double stranded adaptor on activity of CD44-EpCAM aptamer.** (A-C) schematic of CD44-EpCAM and no linker controls. (A) Linker containing CD44-EpCAM; (B) CD44-EpCAM-No linker-1, two “U”s ( underlined) were added to the 3-termini of EpCAM aptamer-adaptor to pair with two “A”; (C) CD44-EpCAM-No linker-2, two “U”s were added to 3-termini of EpCAM aptamer-adaptor to pair with two “A”, and three single base AAU ( blue) by which the unpaired base linker between EpCAM aptamer and double stranded adaptor were removed. (D) Comparison of the activities of single base linker-containing CD44-EpCAM aptamer and no linker controls. OVCAR8 cells were treated with varying concentrations of CD44-EpCAM aptamer and no linker controls for 72h. The removal of all single base linkers between aptamer and double stranded adaptor (CD44-EpCAM no linker-2) has resulted about 95% activity loss, slightly activity (5% cell killing activity) was detected at 4 $\mu$ M, and the other concentrations did not show any efficacy of cytotoxicity. The control with only removal of the linker between CD44 aptamer and double stranded adaptor (CD44-EpCAM No linker-1) showed 25% of cytotoxicity at 2 $\mu$ M and 53% at 4 $\mu$ M. The cytotoxicity of CD44-EpCAM No linker-1 is significantly lower than linker containing CD44-EpCAM which has 77% of cytotoxicity at 2 $\mu$ M and 95 % at 4 $\mu$ M.

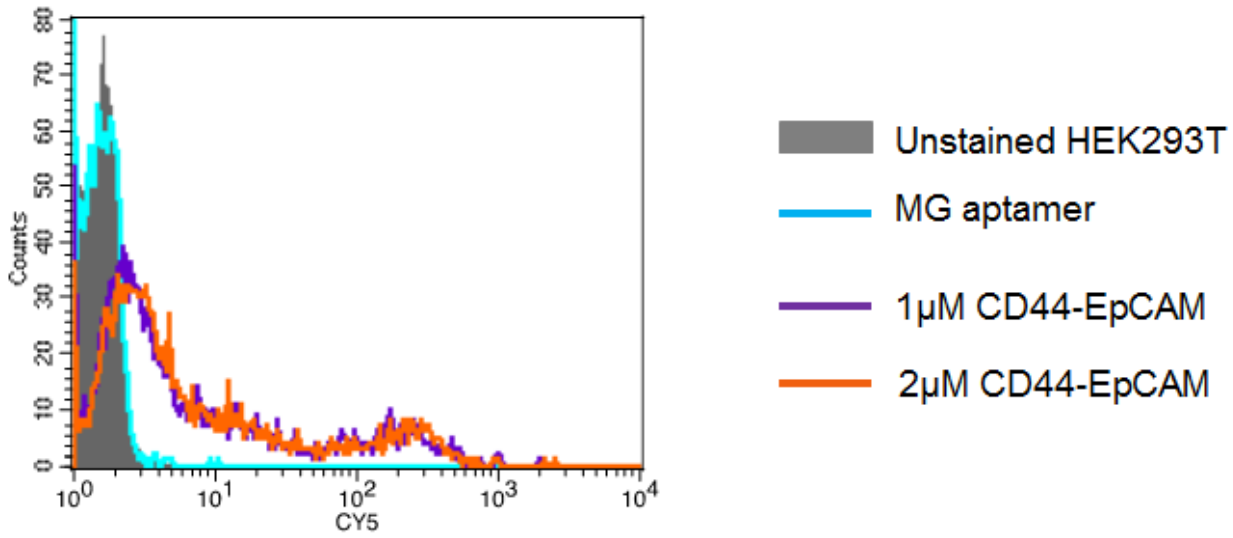

**Figure S2. Evaluation of nonspecific binding of CD44-EpCAM at the concentration of 2μM.** HEK293T were blocked with 500μg/ml sperm DNA, 500μg/ml yeast tRNA and 5% bovine serum albumin in TBS/0.05% tween buffer for 20min, then stained with Cy5 labeled- MG aptamer (1μM) and CD44-EpCMA ( 1μM or 2μM). There is no detectable difference of Cy5 intensity between 1μM and 2μM of CD44-EpCAM.
